# Supplementary material
Source: PubMed Central journal article supplement (PMC9442456)
Supplement: sj-pdf-1-ebm-10.1177_15353702221098060.pdf [file sj-pdf-1-ebm-10.1177_15353702221098060.pdf]

## Supplementary File for Review Only

### **Apigeninidin-enrich *Sorghum bicolor* (L. Moench) extracts alleviate Aflatoxin B<sub>1</sub>-induced dysregulation of male rat's hypothalamic-reproductive axis.**

Solomon E. Owumi<sup>1,\*</sup>, Moses T. Otunla<sup>1</sup>, Uche O. Arunsi<sup>2</sup>, Adegboyega K. Oyelere<sup>3</sup>

<sup>1</sup>Cancer Research and Molecular Biology Laboratories, Department of Biochemistry, Faculty of Basic Medical Sciences, University of Ibadan, Ibadan, Nigeria, 200005.

<sup>2</sup>Department of Cancer Immunology and Biotechnology, School of Medicine, University of Nottingham, Nottingham, UK, NG7 2RD.

<sup>3</sup>School of Chemistry & Biochemistry, Parker H. Petit Institute for Bioengineering and Bioscience, Georgia Institute of Technology, Atlanta, GA, USA 30332-0400

Running Title: Aflatoxin B<sub>1</sub> toxicity and apigeninidin in exposed rats  
Collection, identification, extraction and characterization of Apigeninidin from *Sorghum bicolor* by Liquid Chromatography-Mass Spectrophotometry LC-MS.

Dried *Sorghum bicolor* sheets (5 Kg) was purchased from Bodija Market, Ibadan, Nigeria and were pulverized into very fine powder. Geographically, Bodija market lies between longitude 3 54'36''E and 3 55' 12''E and latitude 7 25' 52''N and 7 26' 22''N. The plant samples were transported in a polythene bag to the Herbarium of the Department of Botany, University of Ibadan, Ibadan, Nigeria for identification by a veteran taxonomist Mr. Donatus Esimekhuai. The sample of *S. bicolor* were identified and deposited in the Department of Botany and a voucher

specimen -Accession number: UIH-23118- assigned for future reference.

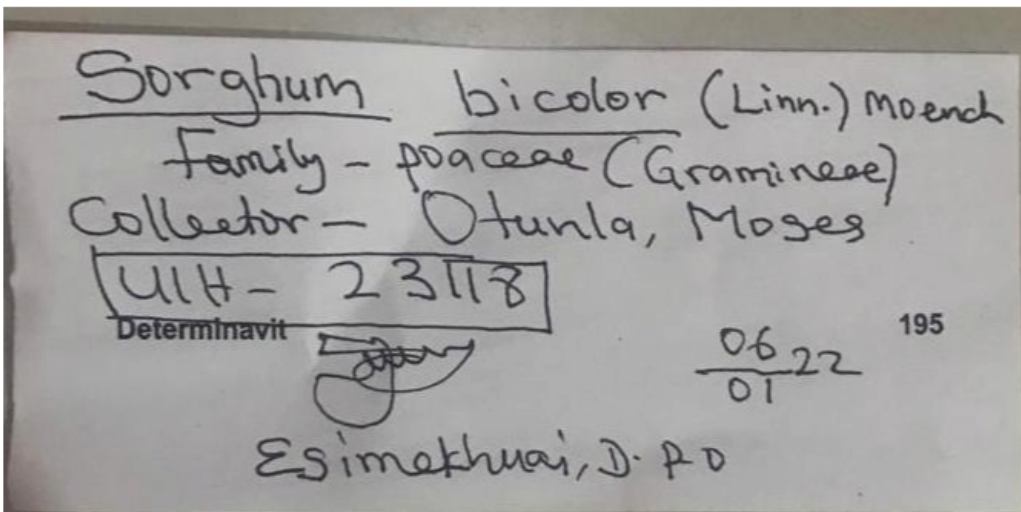

Experimentation with - *S. bicolor*- complied with all relevant institutional, national, and international guidelines and legislation. The plant was sorted to remove dirt and other extraneous materials and pulverized into fine powder.

### **Extraction and phytochemical characterization of *S. bicolor***

Sample of pulverized *S. bicolor* (120 g) is degreased with  $\text{CH}_2\text{Cl}_2$  and subsequently extracted with  $\text{CH}_2\text{Cl}_2$ : MeOH 10:1 (twice) at 60°C and 0.1% HCl in EtOH at room temperature. Each filtrate was evaporated off to give SBE-05 (2.6 g), SBE-06 (1.44 g) and SBE-07 (4.85g) as brownish-red solid.

### **LC-MS analysis**

The isolated solid from each fraction – SBE-05, SBE-06 and SBE-07 – was analyzed were analyzed by LC-MS, monitoring at 420 nm, on a Bruker amaZon SL ion trap mass spectrometer coupled to an Agilent 1260 HPLC. Chromatography was performed on Phenomenex C18 reversed phase HPLC column (250 × 4.6 mm; S/NO: H17-238591) at a flow rate of 0.5 mL/min;

using 0.1% v/v formic acid in H<sub>2</sub>O (solvent A) and 0.1% v/v formic acid in MeCN (solvent B).

The solvent gradient for chromatography elution is as follows: 0–5 min at 5% solvent B; 5–25 min from 5% to 100% solvent B; 25–28 min at 100% solvent B; 28–29 min from 100% to 5% solvent B; and 29–32 min at 5% solvent B. Mass spectrometry data were collected in the positive and negative ionization modes in the mass range  $m/z$  100–1000 Da.

)

# SBE-05

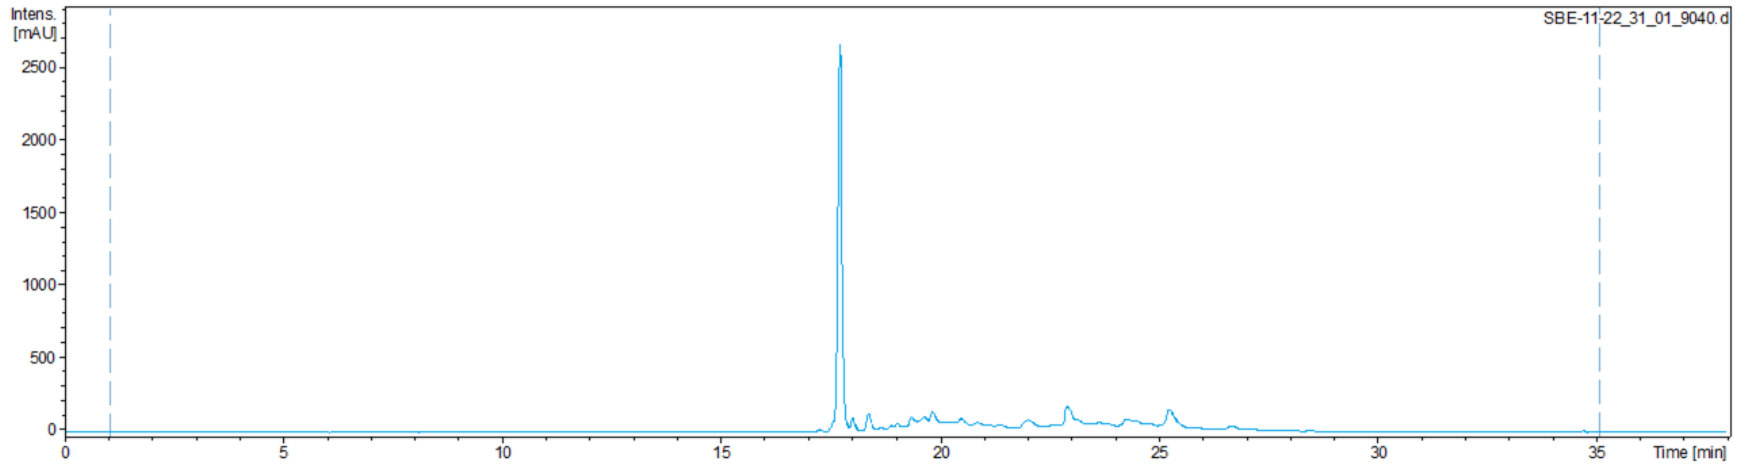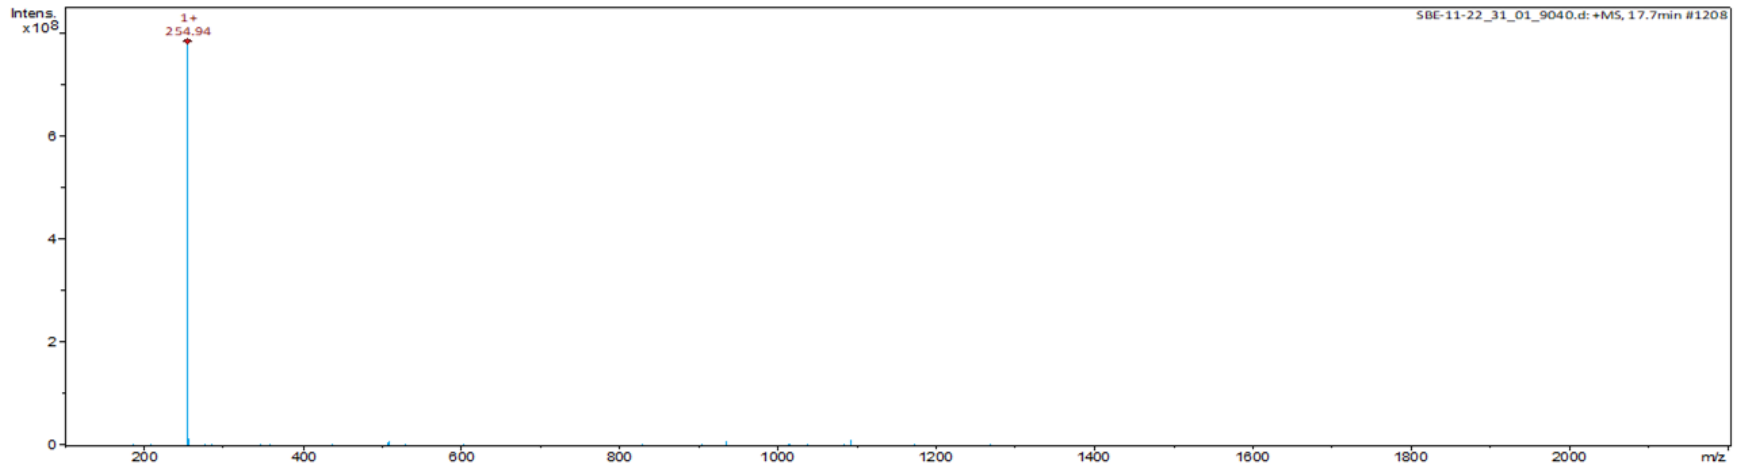

# SBE-06

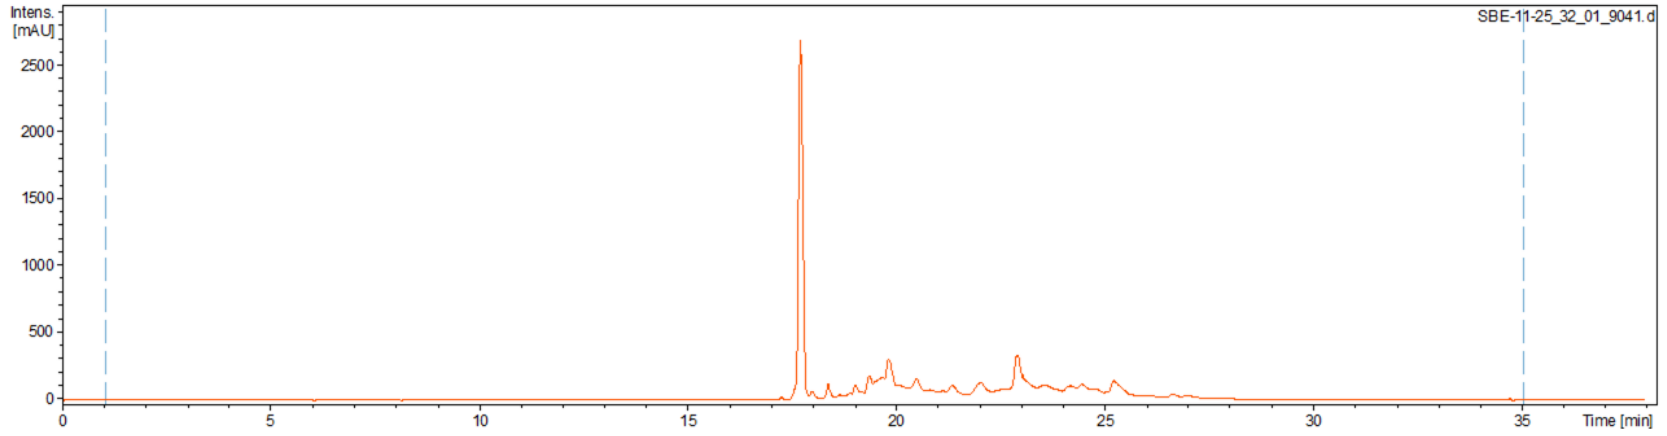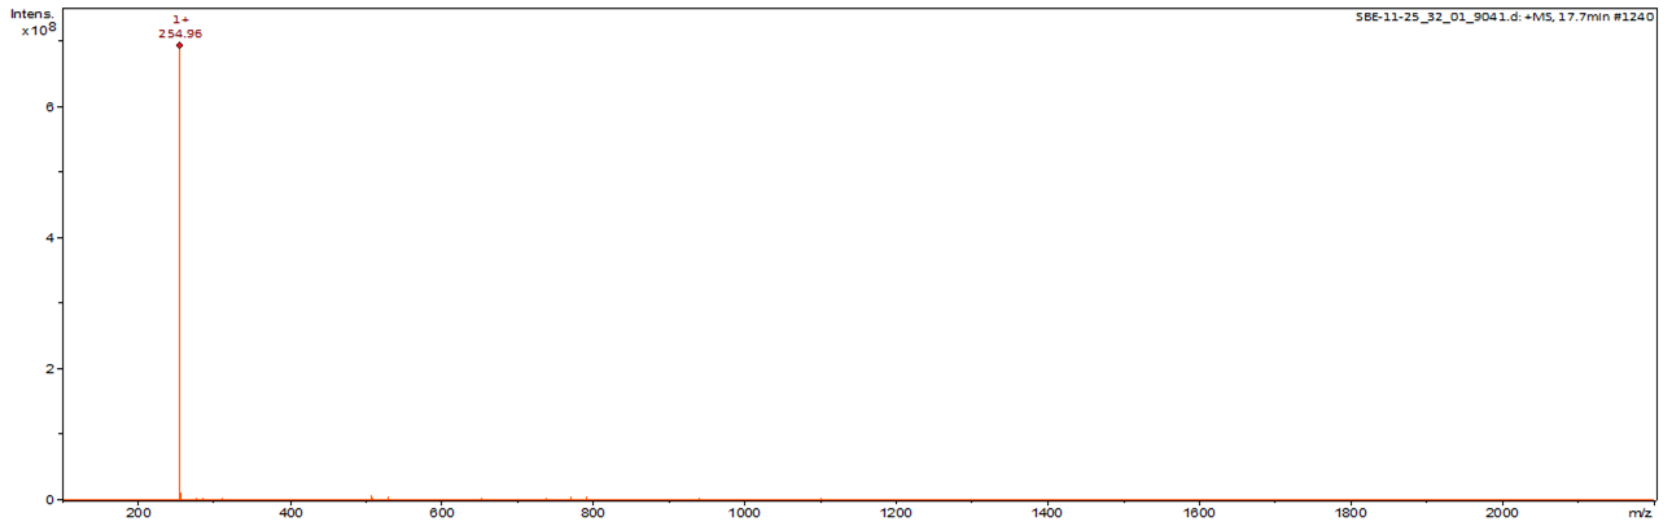

(iii)

SBE-07

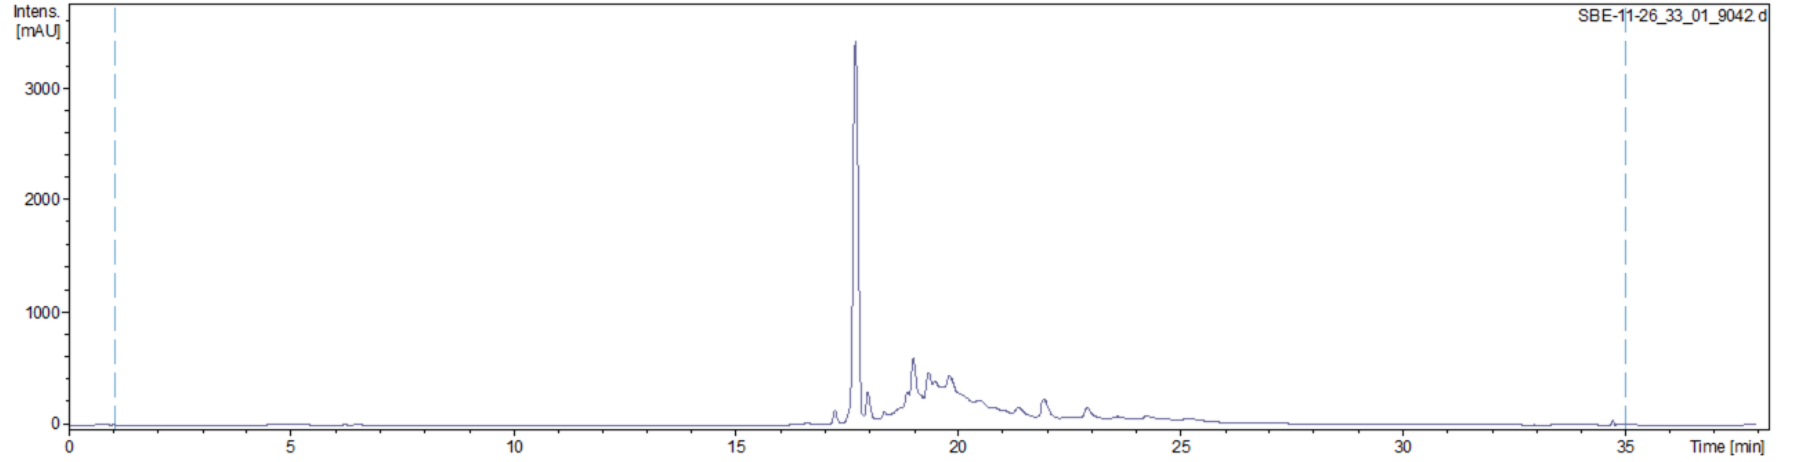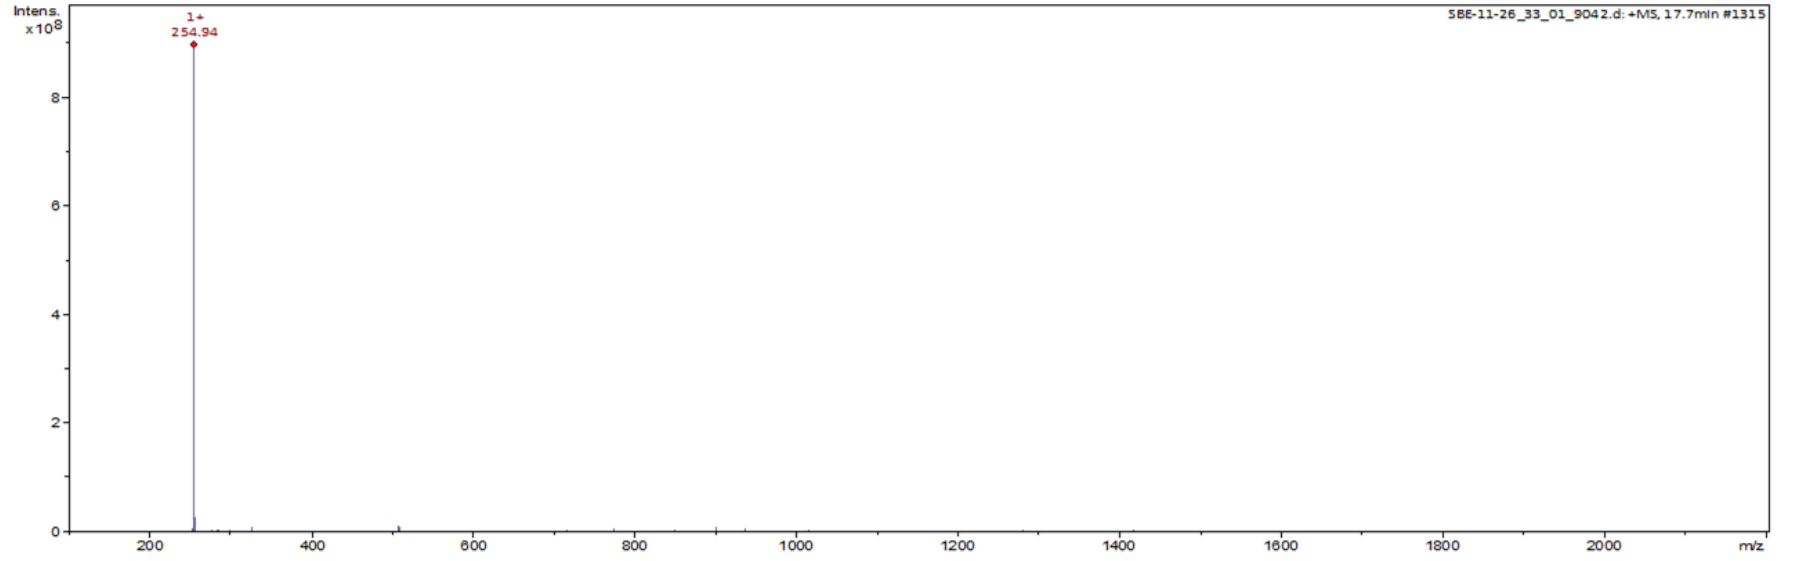

## Supplementary S1

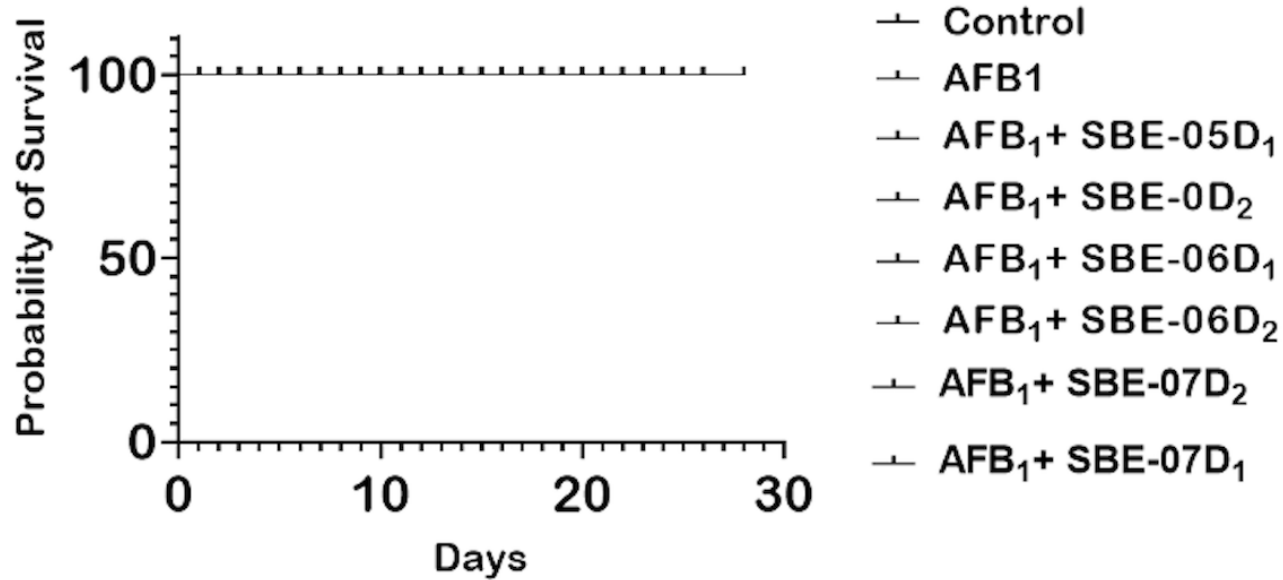

**Supplementary Figure 1:** Effect of API and AFB<sub>1</sub> treatment on experimental rats -Kaplan-Meyers Survival Indicator. AFB<sub>1</sub>, 50µg/kg; AFB<sub>1</sub>+SBE-05-D1, (0.05+5) mg/kg; AFB<sub>1</sub>+SBE-5-D2, (0.05+10) mg/kg; AFB<sub>1</sub>+SBE-06-D1, (0.05+5) mg/kg; AFB<sub>1</sub>+SBE-06-D2, (0.05+10) mg/kg; AFB<sub>1</sub>+SBE-07-D1, (0.05+5) mg/kg; AFB<sub>1</sub>+SBE-07-D2, (0.05+10) mg/kg.

# Supplementary S2

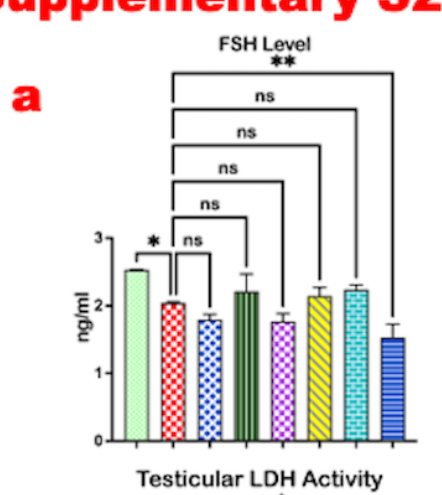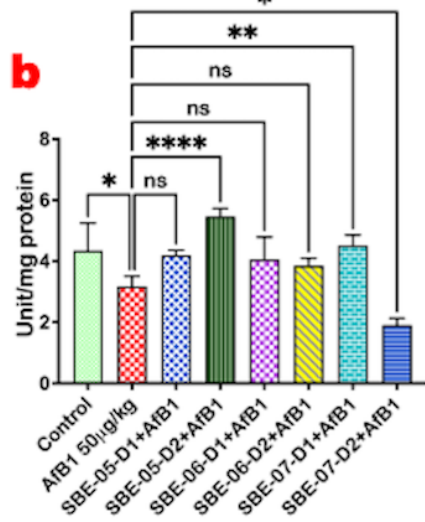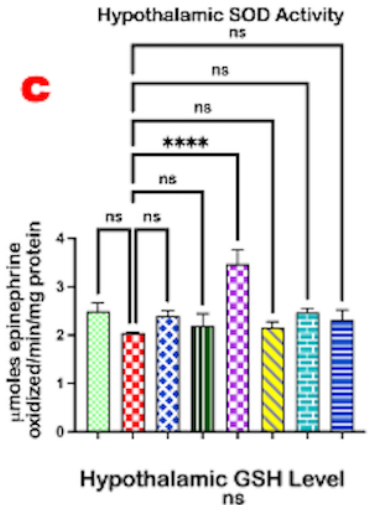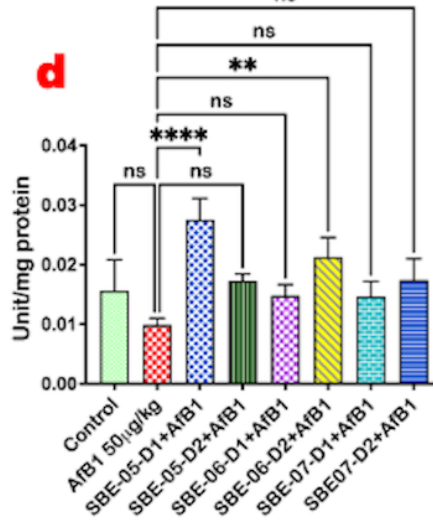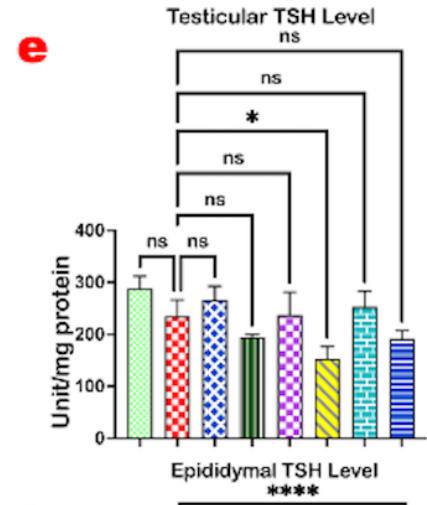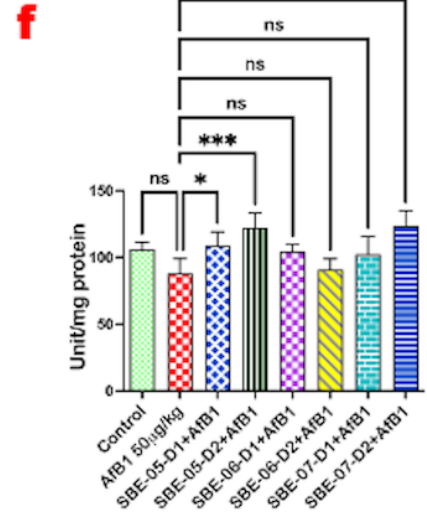



**Supplementary Figure 2:** Effect of API on testicular activities of FSH, LDH, and the levels of testicular, epididymal and hypothalamic SOD, GSH and TSH in AFB<sub>1</sub>-treated rats. AFB<sub>1</sub>, 50µg/kg; AFB<sub>1</sub>+SBE-05-D1, (0.05+5) mg/kg; AFB<sub>1</sub>+SBE-5-D2, (0.05+10) mg/kg; AFB<sub>1</sub>+SBE-06-D1, (0.05+5) mg/kg; AFB<sub>1</sub>+SBE-06-D2, (0.05+10) mg/kg; AFB<sub>1</sub>+SBE-07-D1, (0.05+5) mg/kg; AFB<sub>1</sub>+SBE-07-D2, (0.05+10) mg/kg. Values are expressed as mean (SD) for 6 rats per group. \*: Values differ significantly from control ( $p<0.05$ ). \*\*: Values differ significantly from AFB<sub>1</sub> alone ( $p<0.05$ ). ns: not significant. FSH: follicle stimulating hormone; LDH: lactate dehydrogenase; SOD: superoxide dismutase; GSH: glutathione and TSH: total thiol.

# Supplementary S3

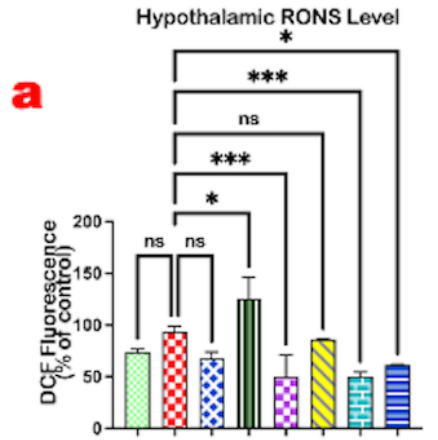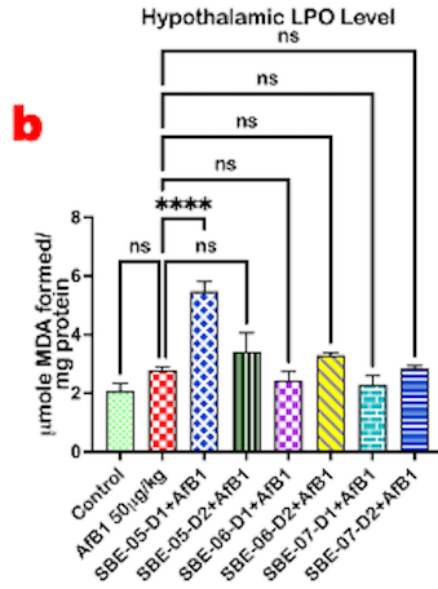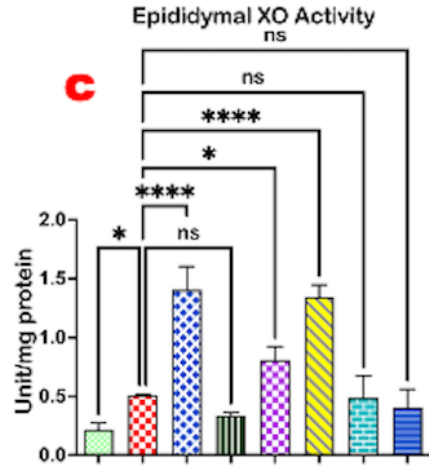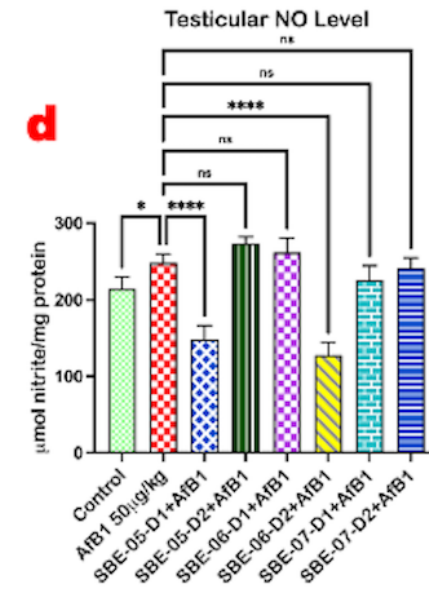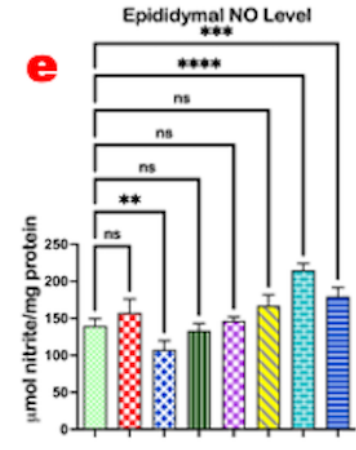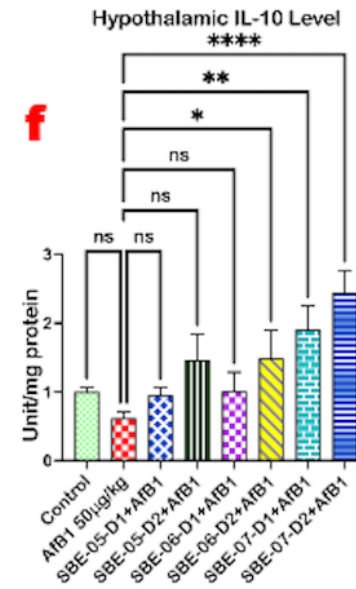

**Supplementary Figure 3:** Effect of API on the levels of testicular, epididymal and hypothalamic RONS, LPO, XO, NO, IL-and 10 in AFB<sub>1</sub>-treated rats. AFB<sub>1</sub>, 50µg/kg; AFB<sub>1</sub>+SBE-05-D1, (0.05+5) mg/kg; AFB<sub>1</sub>+SBE-5-D2, (0.05+10) mg/kg; AFB<sub>1</sub>+SBE-06-D1, (0.05+5) mg/kg; AFB<sub>1</sub>+SBE-06-D2, (0.05+10) mg/kg; AFB<sub>1</sub>+SBE-07-D1, (0.05+5) mg/kg; AFB<sub>1</sub>+SBE-07-D2, (0.05+10) mg/kg. Values are expressed as mean (SD) for 6 rats per group. \*: Values differ significantly from control ( $p<0.05$ ). \*\*: Values differ significantly from AFB<sub>1</sub> alone ( $p<0.05$ ). ns: not significant. RONS: reactive oxygen and nitrogen species; LPO: lipid peroxidation; XO: xanthine oxidase; NO: nitric oxide; IL-10: Interleukine-10.

## Supplementary S4

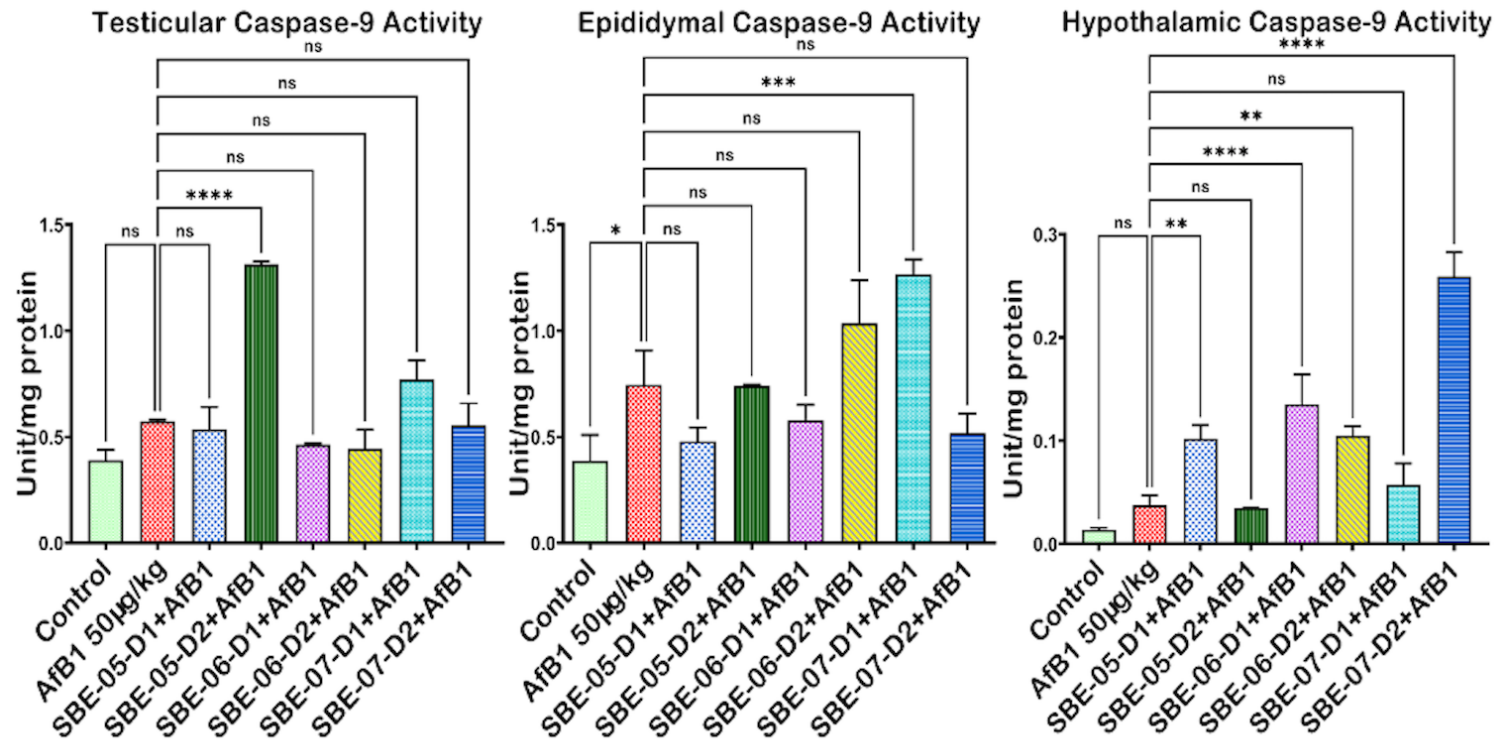

**Supplementary Figure 4:** Effect of API on the activity of Caspase-9 in the testes, epididymis and hypothalamus of AFB<sub>1</sub>-exposed rats. AFB<sub>1</sub>, 50µg/kg; AFB<sub>1</sub>+SBE-05-D1, (0.05+5) mg/kg; AFB<sub>1</sub>+SBE-5-D2, (0.05+10) mg/kg; AFB<sub>1</sub>+SBE-06-D1, (0.05+5) mg/kg; AFB<sub>1</sub>+SBE-06-D2, (0.05+10) mg/kg; AFB<sub>1</sub>+SBE-07-D1, (0.05+5) mg/kg; AFB<sub>1</sub>+SBE-07-D2, (0.05+10) mg/kg. Values are expressed as mean (SD) for 6 rats per group. \*: Values differ significantly from control ( $p < 0.05$ ). \*\*: Values differ significantly from AFB<sub>1</sub> alone ( $p < 0.05$ ). ns: not significant.
